# Supplementary material
Source: Springer Nature journal article supplement (https://www.springermedizin.de/resource/supplementary/12955_2011_934_MOESM1_ESM.pdf/9558722)
Supplement: MOESM1 [file 9558722]

### Vignette 1

- Karl is in his mid-30s and has schizophrenia. He usually lives in supported accommodation.
- Karl hears voices telling him to do things that others cannot hear, as well as bizarre thoughts and images of others spying and plotting to harm him. He is becoming withdrawn, anxious and unable to care for himself, just like when he was really sick before. This has forced him to go back into hospital for treatment.
- Not many people visit him in hospital, although he usually doesn't want to see anyone anyway. Karl really wishes he was back at home and feeling better.
- For many years, Karl has found it difficult to stay in a paid job.
- Karl feels very distressed.
- He feels like the other people in the hospital are watching him, and talking about him behind his back.

### Vignette 2

- Karl is in his mid-30s and has schizophrenia. He lives in supported accommodation.
- His schizophrenia puts limits on his daily life, but he is generally able to look after himself and is able to complete some household chores.
- He attends support group meetings and appointments with his counsellor.
- Sometimes Karl still hears things that no one else hears. He thinks someone is calling his name but when he turns around, no one is there. The things they say aren't scary, like when he was really sick before, as the voices are just calling his name. Karl still experiences some paranoid thoughts but with help from his counsellor he is able to cope with this.
- Karl lacks motivation and drive to look for work, and sometimes doesn't find pleasure in daily activities. He sometimes lacks awareness of personal grooming and has difficulty in maintaining friendships.
- Karl gets medication to help treat his schizophrenia. The medication is given as an injection which is long acting.
- The injection is given in his buttock or arm. The pain experienced with an injection is a moderate stinging pain that lasts about one hour.

Karl has to travel by public transport once every two weeks to receive the injection, which is given by a nurse.

### Vignette 3

- Karl is in his mid-30s and has schizophrenia. He lives in supported accommodation.
- His schizophrenia puts significant limits on his daily life, but he is generally able to look after himself and is able to complete some household chores.
- He attends support group meetings and appointments with his counsellor.
- Sometimes Karl still hears things that no one else hears. He thinks someone is calling his name but when he turns around, no one is there. The things they say aren't scary, like when he was really sick before, as the voices are just calling his name. Karl still experiences some paranoid thoughts but with help from his counsellor he is able to cope with this.
- Karl lacks motivation and drive to look for work, and sometimes doesn't find pleasure in daily activities. He sometimes lacks awareness of personal grooming and has difficulty in maintaining friendships.
- Karl gets medication to help treat his schizophrenia. The medication is given as an injection which is long acting.
- The injection is given in his buttock or arm. The pain experienced with an injection is a moderate stinging pain that lasts about one hour.

Karl has to travel by public transport once every four weeks to receive the injection, which is given by a nurse.

### Vignette 4

- Karl is in his mid-30s and has schizophrenia. He lives in supported accommodation.
- His schizophrenia puts significant limits on his daily life, but he is generally able to look after himself and is able to complete some household chores.
- He attends support group meetings and appointments with his counsellor.
- Sometimes Karl still hears things that no one else hears. He thinks someone is calling his name but when he turns around, no one is there. The things they say aren't scary, like when he was really sick before, as the voices are just calling his name. Karl still experiences some paranoid thoughts but with help from his counsellor he is able to cope with this.
- Karl lacks motivation and drive to look for work, and sometimes doesn't find pleasure in daily activities. He sometimes lacks awareness of personal grooming and has difficulty in maintaining friendships.
- Karl gets medication to help treat his schizophrenia. The medication is given as an injection which is long acting.
- The injection is given in his buttock or arm. The pain experienced with an injection is a moderate stinging pain that lasts about one hour.

Karl has to travel by public transport once every three months to receive the injection, which is given by a nurse.
